# Supplementary material for: Nd2−xSrxNiO4 Solid Solutions: Synthesis, Structure and Enhanced Catalytic Properties of Their Reduction Products in the Dry Reforming of Methane
Source: MDPI journal article supplement (doi:10.3390/catal13060966), 2023-06-02
Supplement: s1 [file s1]

Archive with 1 entries (1 files):
- catalysts-2254734-supplementary.pdf
