# Supplementary material for: Nd2−xSrxNiO4 Solid Solutions: Synthesis, Structure and Enhanced Catalytic Properties of Their Reduction Products in the Dry Reforming of Methane
Source: MDPI journal article supplement (doi:10.3390/catal13060966), 2023-06-02
Supplement: s1 [file s1 › catalysts-2254734-supplementary.pdf]

## Supplementary Materials

# Nd<sub>2-x</sub>Sr<sub>x</sub>NiO<sub>4</sub> Solid Solutions: Synthesis, Structure and Enhanced Catalytic Properties of Their Reduction Products in the Dry Reforming of Methane

Oleg A. Shlyakhtin <sup>1,\*</sup>, Grigoriy M. Timofeev <sup>1</sup>, Sergey A. Malyshev <sup>1,2</sup>, Alexey S. Loktev <sup>3,4,5</sup>, Galina N. Mazo <sup>1</sup>,

Tatiana Shatalova <sup>1,2,6</sup>, Veronika Arkhipova <sup>4</sup>, Ilya V. Roslyakov <sup>5,6</sup> and Alexey G. Dedov <sup>3,4,5</sup>

<sup>1</sup> Department of Chemistry, M.V. Lomonosov Moscow State University, 119991 Moscow, Russia

<sup>2</sup> Department of Materials Sciences, Shenzhen MSU-BIT University, Shenzhen 518172, China

<sup>3</sup> A.V. Topchiev Institute of Petrochemical Synthesis, Russian Academy of Sciences, 119991 Moscow, Russia

<sup>4</sup> Department of General and Applied Chemistry, Gubkin Russian State University of Oil and Gas, 119991 Moscow, Russia

<sup>5</sup> N.S. Kurnakov Institute of General and Inorganic Chemistry, Russian Academy of Sciences, 119991 Moscow, Russia

<sup>6</sup> Department of Materials Sciences, M.V. Lomonosov Moscow State University, 119991 Moscow, Russia

\* Correspondence: oleg@inorg.chem.msu.ru

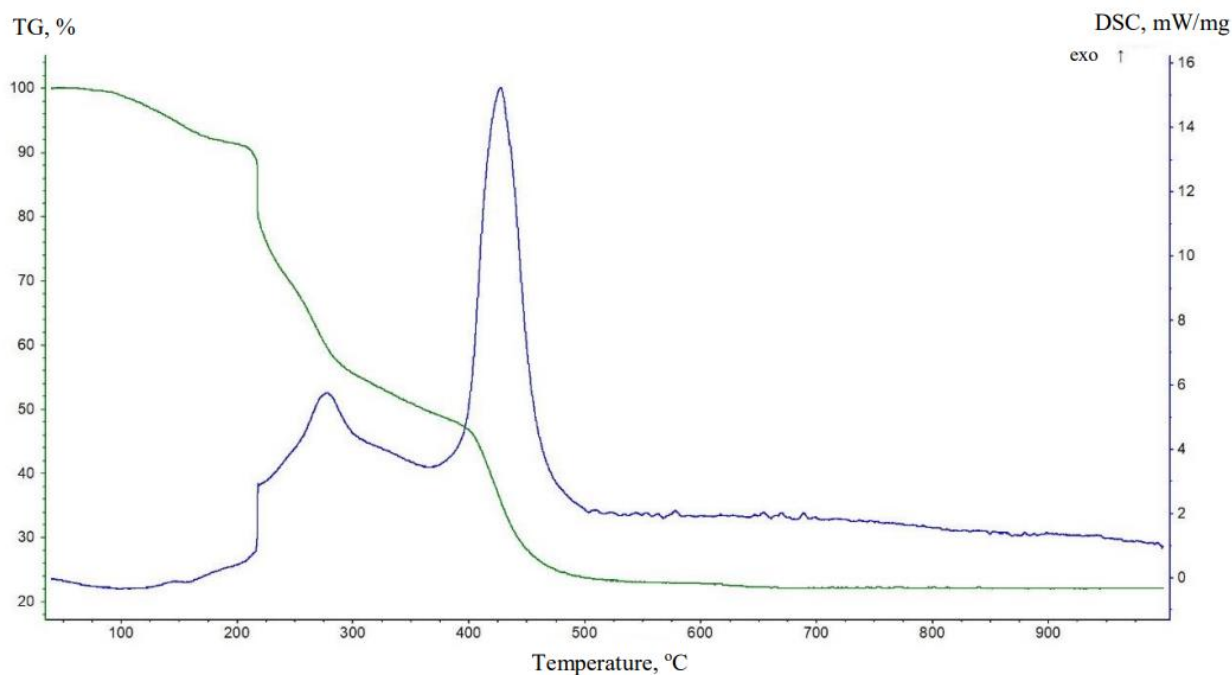

**Figure. S1.** TG (green) and DSC (blue) profiles of freeze-dried Nd<sub>2</sub>NiO<sub>4</sub> precursor.

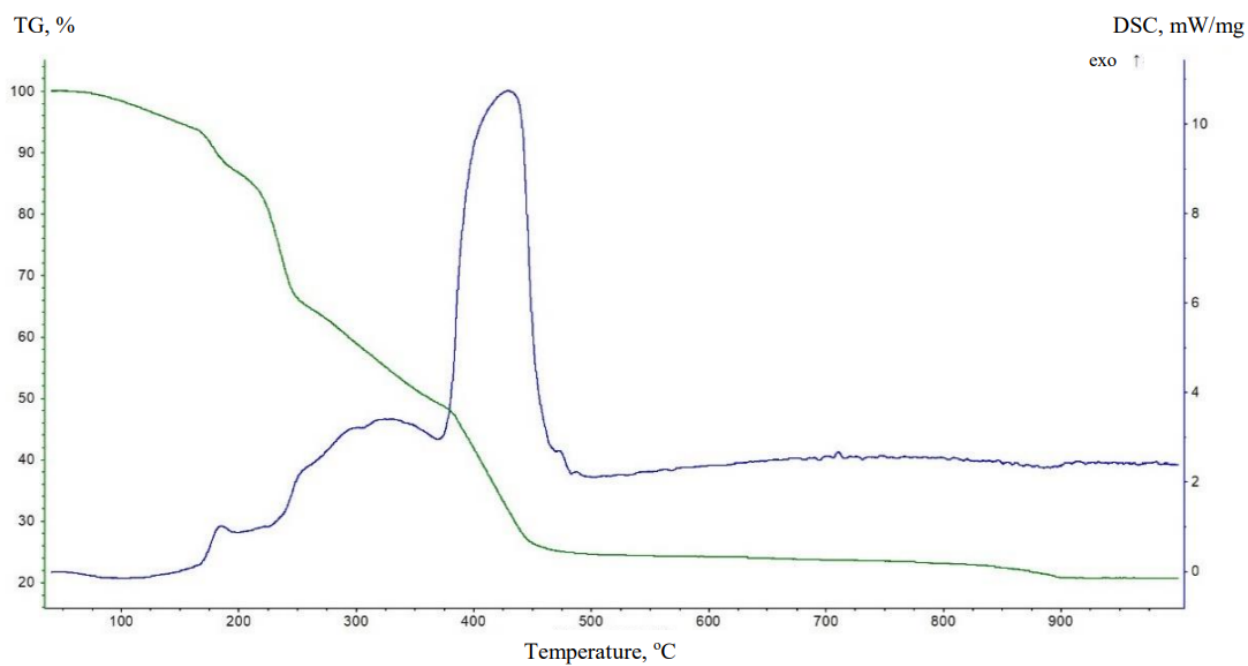

**Figure. S2.** TG (green) and DSC (blue) profiles of freeze-dried  $\text{Nd}_{0.6}\text{Sr}_{1.4}\text{NiO}_4$  precursor.

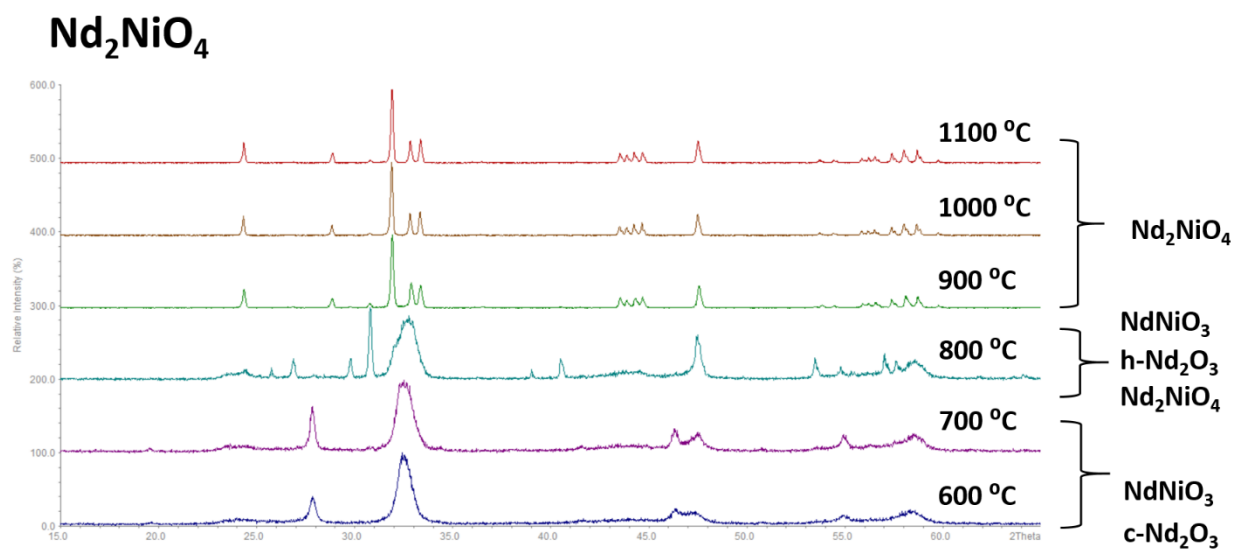

**Figure. S3.** XRD patterns of thermal decomposition products of  $\text{Nd}_2\text{NiO}_4$  ( $x=0$ ) precursors at different temperatures.

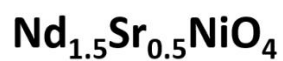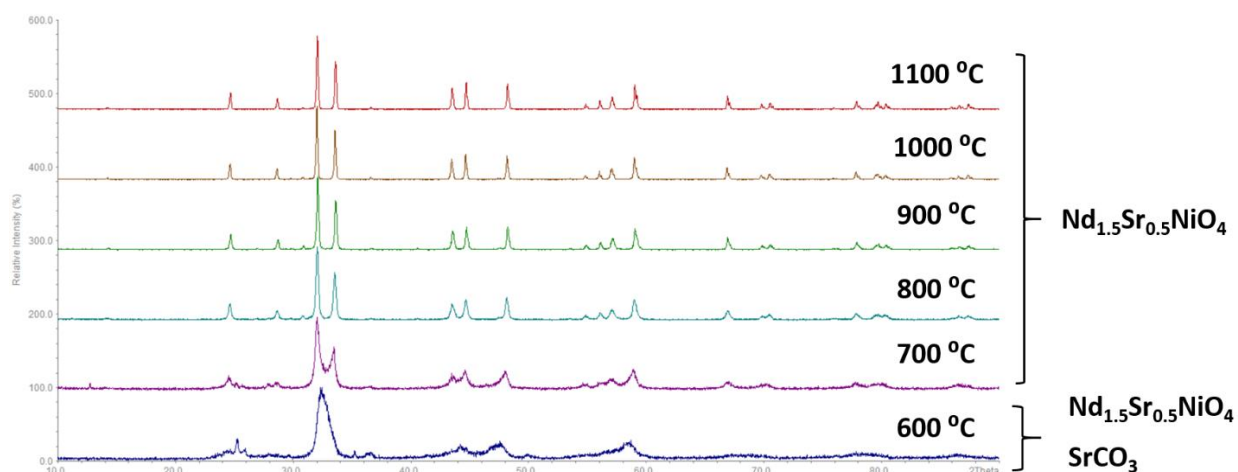

**Figure. S4.** XRD patterns of thermal decomposition products of  $\text{Nd}_{1.5}\text{Sr}_{0.5}\text{NiO}_4$  ( $x=0.5$ ) precursors at different temperatures.

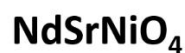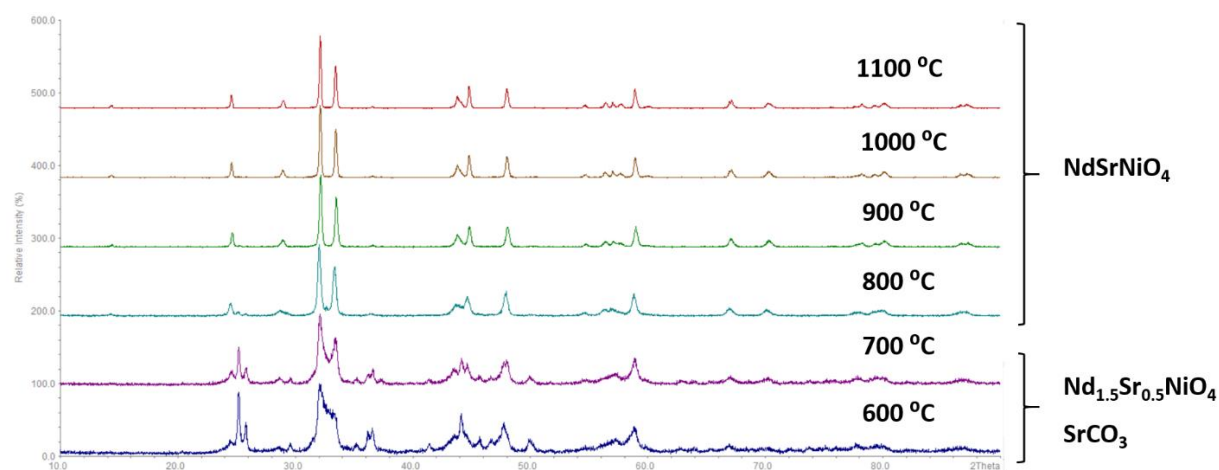

**Figure. S5.** XRD patterns of thermal decomposition products of  $\text{NdSrNiO}_4$  ( $x=1$ ) precursors at different temperatures.

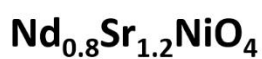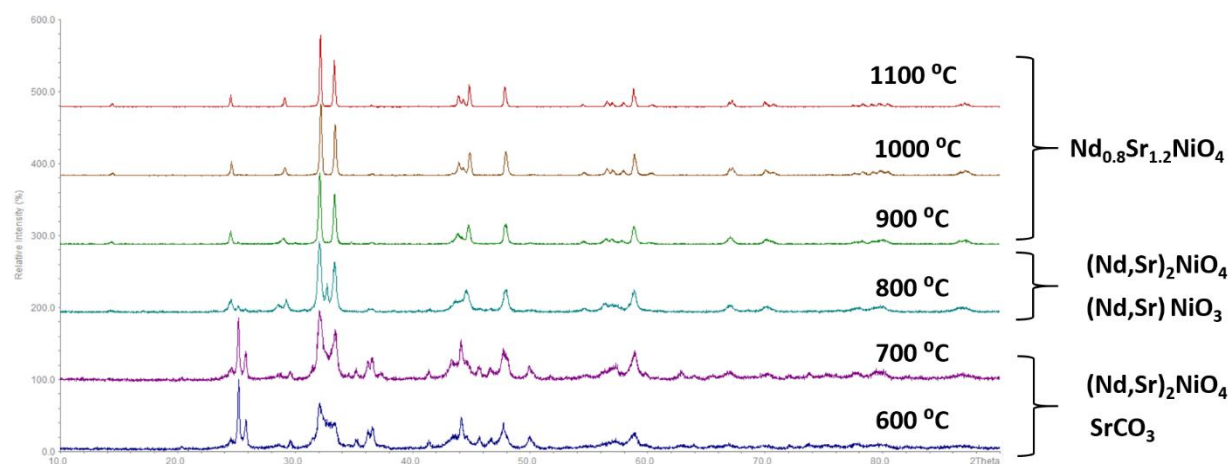

**Figure. S6.** XRD patterns of thermal decomposition products of  $\text{Nd}_{0.8}\text{Sr}_{1.2}\text{NiO}_4$  ( $x=1.2$ ) precursors at different temperatures.

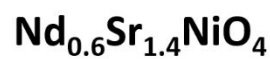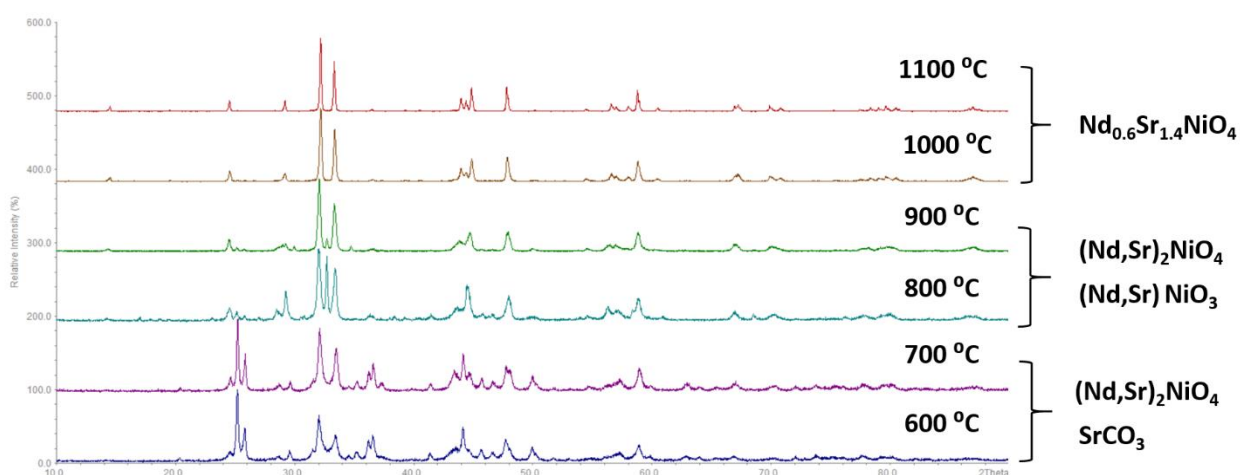

**Figure. S7.** XRD patterns of thermal decomposition products of  $\text{Nd}_{0.6}\text{Sr}_{1.4}\text{NiO}_4$  ( $x=1.4$ ) precursors at different temperatures.

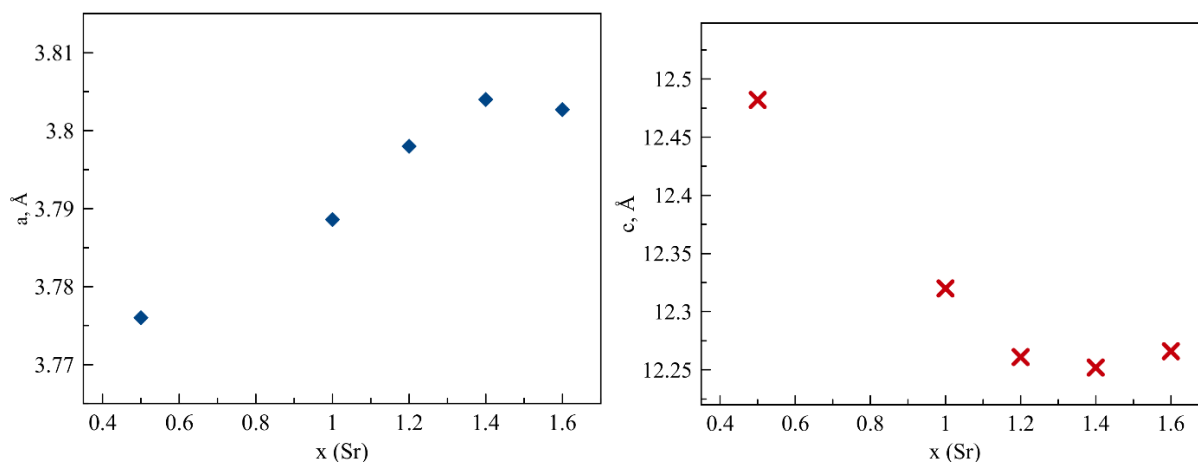

**Figure. S8.** The dependence of  $\text{Nd}_{2-x}\text{Sr}_x\text{NiO}_{4\pm\delta}$  lattice parameters on Sr content.

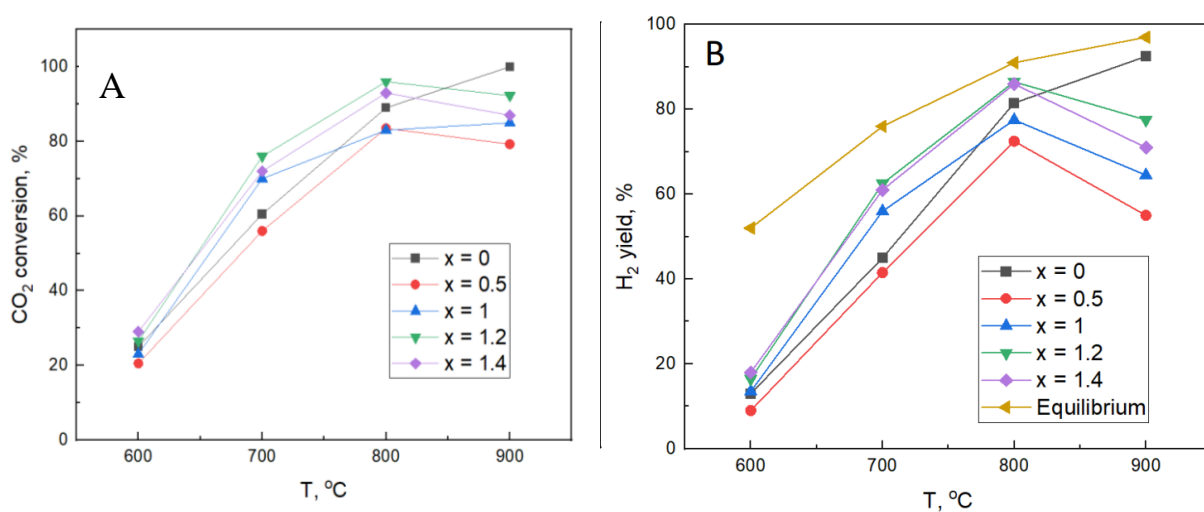

**Figure. S9.** CO<sub>2</sub> conversion (A) and H<sub>2</sub> yield (B) over the reduction products of various composites. The calculated values of H<sub>2</sub> yield are given according to [13, 31–33]

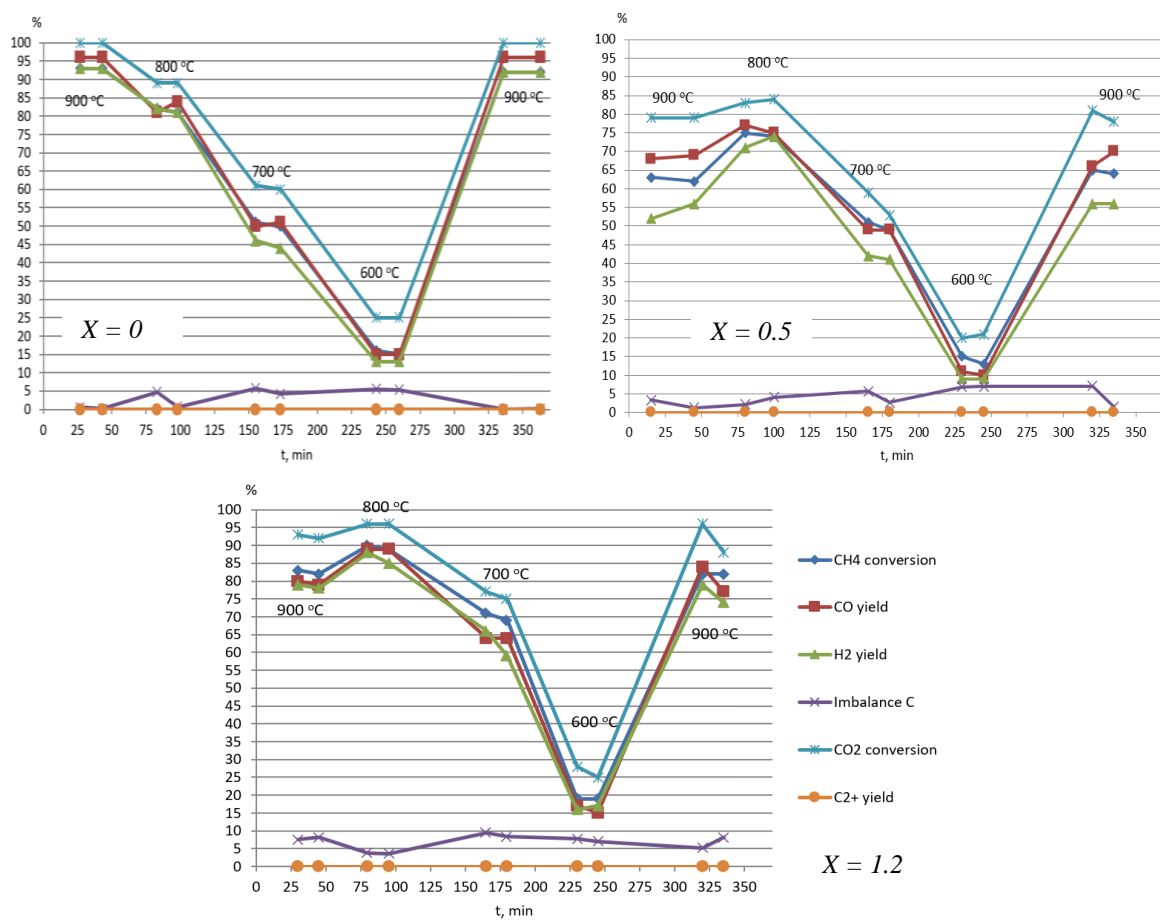

**Figure. S10.** The results of testing the composites with various Sr content in the DRM process.

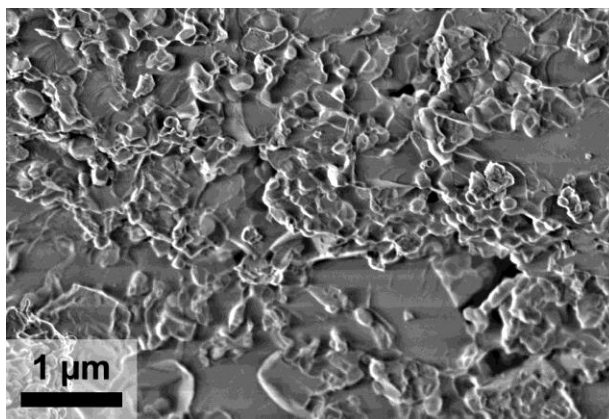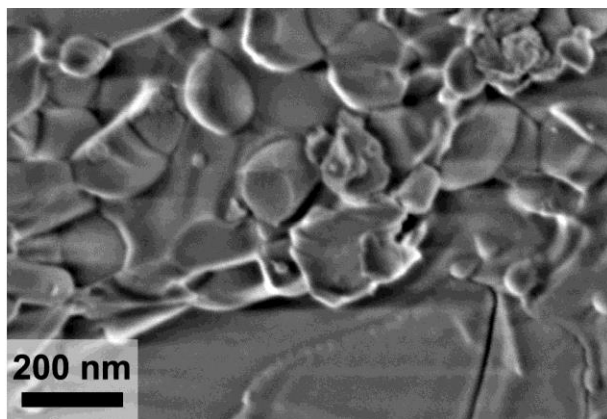

**Figure. S11.** SEM micrographs of the spent catalyst ( $x = 1.4$ ).
